# Supplementary material for: Biodegradable Active Packaging as an Alternative to Conventional Packaging: A Case Study with Chicken Fillets
Source: MDPI journal article supplement (doi:10.3390/foods10051126), 2021-05-19
Supplement: s1 [file s1]

## Supporting information

**Table S1.** General linear model results .

|                 |           | Dip loss | Dry matter | TVC    | LAB    | STAA   | VRBGA  |
|-----------------|-----------|----------|------------|--------|--------|--------|--------|
| Material (tray) | M         | 2.54     | 8.78       | 0.67   | 2.72   | 3.33   | 0.77   |
| Packaging Gas   | G         | 0.57     | 0.31       | 0.14   | 0.30   | 6.21   | 15.10  |
| storage time    | T         | 40.49    | 12.32      | 85.44  | 80.44  | 69.76  | 75.40  |
|                 | MxG       | 7.09     | 2.20       | 4.25   | 6.39   | 0.73   | 1.94   |
|                 | MxT       | 2.17     | 9.64       | 4.03   | 3.21   | 5.04   | 2.33   |
|                 | GxT       | 2.18     | 1.50       | 0.09   | 0.06   | 0.28   | 1.99   |
|                 | Error     | 44.96    | 65.26      | 5.37   | 6.88   | 14.65  | 2.46   |
|                 | R-sq(adj) | 42.07%   | 15.59%     | 93.05% | 91.00% | 80.83% | 96.81% |

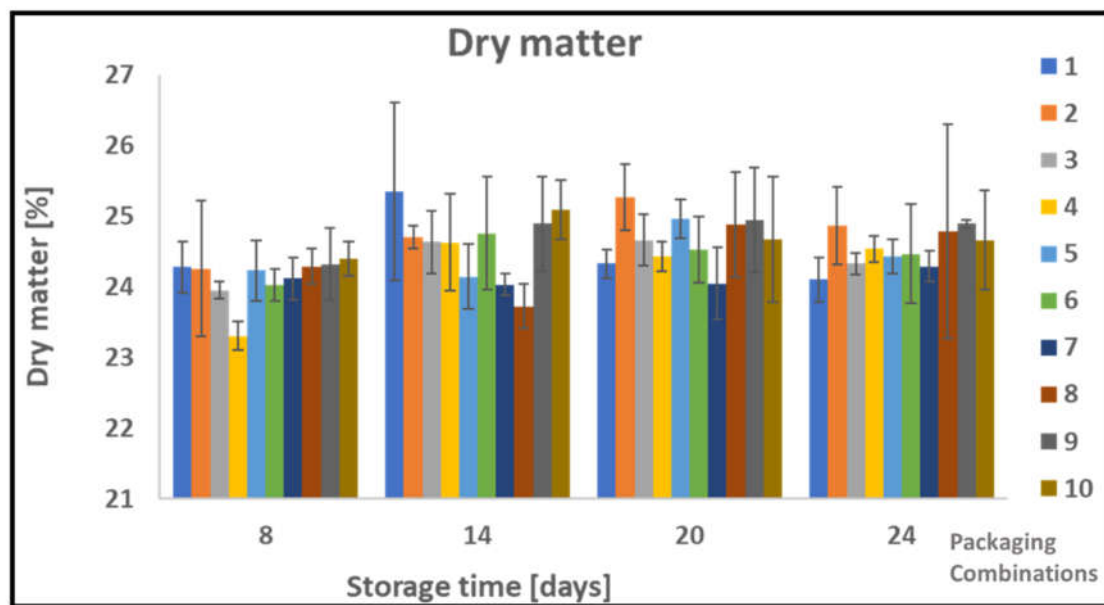

**Figure S1:** Dry matter of chicken samples as a function of storage time for different packaging combinations.

**Table S2:** Average values and p-values for each sensory attribute – appearance and texture

| Samples from Packaging combinations | Colour hue | Colour intensity | Whiteness | Colour evenness | Glossiness | Dried performance (appearance) | Dried performance (texture) | Firmness |
|-------------------------------------|------------|------------------|-----------|-----------------|------------|--------------------------------|-----------------------------|----------|
| 1.                                  | 6.18 AB    | 4.54 AB          | 5.36 A    | 5.56 A          | 6.21 AB    | 1.03 A                         | 1.01 A                      | 5.94 A   |
| 2.                                  | 5.90 ABC   | 4.26 AB          | 5.52 A    | 6.08 A          | 5.39 BC    | 1.13 A                         | 1.09 A                      | 6.20 A   |
| 3.                                  | 4.47 D     | 4.57 AB          | 5.19 A    | 4.84 A          | 6.25 A     | 1.16 A                         | 1.22 A                      | 5.26 A   |
| 4.                                  | 4.49 D     | 4.86 A           | 4.98 A    | 4.77 A          | 5.50 ABC   | 1.15 A                         | 1.33 A                      | 5.81 A   |
| 5.                                  | 6.02 ABC   | 3.99 B           | 5.69 A    | 5.88 A          | 6.32 A     | 1.11 A                         | 1.06 A                      | 5.76 A   |
| 6.                                  | 5.89 ABC   | 4.29 AB          | 5.53 A    | 5.42 A          | 5.25 C     | 1.08 A                         | 1.01 A                      | 5.66 A   |
| 7.                                  | 5.10 CD    | 4.37 AB          | 5.39 A    | 5.22 A          | 5.92 ABC   | 1.32 A                         | 1.16 A                      | 5.56 A   |
| 8.                                  | 5.27 BCD   | 4.48 AB          | 5.32 A    | 5.54 A          | 5.64 ABC   | 1.14 A                         | 1.17 A                      | 5.89 A   |
| 9.                                  | 5.66 ABC   | 4.44 AB          | 5.30 A    | 6.06 A          | 5.82 ABC   | 1.01 A                         | 1.00 A                      | 5.71 A   |
| 10.                                 | 6.37 A     | 4.71 AB          | 5.06 A    | 5.80 A          | 5.65 ABC   | 1.03 A                         | 1.01 A                      | 5.36 A   |
| P- value                            | <0.001     | 0.026            | 0.054     | 0.099           | <0.001     | 0.187                          | 0.128                       | 0.311    |

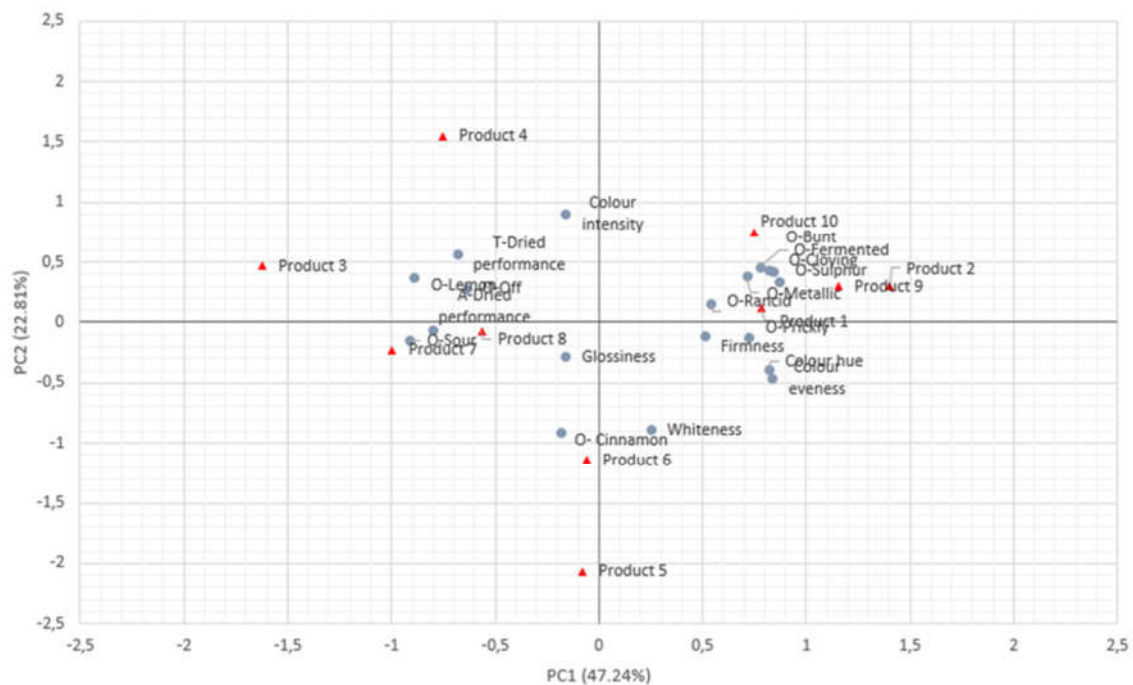

**Figure S2:** Bi-plot over samples and attributes - all attributes, O=Odour, T=Texture



|                                                                                               |        |         |         |         |        |          |        |         |
|-----------------------------------------------------------------------------------------------|--------|---------|---------|---------|--------|----------|--------|---------|
| 3-Buten-2-ol, 2-methyl-                                                                       |        |         |         | 500.321 | 271.69 | 147.832  |        |         |
| Camphene                                                                                      |        |         |         |         |        |          | 526.35 | 465.262 |
| .beta.-Pinene                                                                                 |        |         |         |         |        |          | 330.44 | 286.573 |
| (+)-3-Carene                                                                                  |        |         |         |         |        |          | 88.695 | 67.6191 |
| .alpha.-Phellandrene                                                                          |        |         |         |         |        |          | 757.35 | 538.148 |
| .beta.-Myrcene                                                                                |        |         |         |         |        |          | 89.427 | 54.3758 |
| 1,3-Cyclohexadiene, 1-methyl-4-(1-methylethyl)- / (+)-2-Carene                                |        |         |         |         |        |          | 123.82 | 83.0169 |
| Cyclopentanone                                                                                | 63.486 | 45.3996 | 37.7423 | 52.786  | 30.736 | 21.10014 | 46.679 | 33.266  |
| 2,3-Dehydro-1,8-cineole                                                                       |        |         |         | 9.06971 | 6.5041 | 4.657915 |        |         |
| D-Limonene                                                                                    |        |         |         | 25.5858 | 12.691 | 8.437234 | 247.37 | 168.612 |
| Eucalyptol                                                                                    |        |         |         |         |        |          | 110.66 | 97.8995 |
| .beta.-Phellandrene                                                                           |        |         |         |         |        |          | 340.48 | 242.038 |
| 2-Butenal, 3-methyl-                                                                          |        |         |         | 14.2721 | 6.8797 | 4.476313 |        |         |
| 2,6-Dimethyl-1,3,5,7-octatetraene, E,E-                                                       |        |         |         | 6.35335 | 3.5019 | 3.399091 |        |         |
| Cyclobutene, bis(1-methylethylidene)-                                                         |        |         |         | 9.88807 |        |          |        |         |
| Butyl 2-methylbutanoate                                                                       |        |         |         | 5.28733 | 3.4716 |          | 2.2701 |         |
| (1R)-2,6,6-Trimethylbicyclo[3.1.1]hept-2-ene                                                  |        |         |         |         |        |          | 4.1279 | 2.38331 |
| .gamma.-Terpinene                                                                             |        |         |         |         |        |          | 27.828 | 18.7284 |
| 1,3,8-p-Menthatriene / Benzene, 1,4-diethyl- / Bicyclo[3.2.1]oct-2-ene, 3-methyl-4-methylene- |        |         |         | 16.7257 | 8.4728 | 7.173192 |        |         |
| .beta.-Ocimene                                                                                |        |         |         |         |        |          | 13.849 | 7.85726 |
| Styrene                                                                                       | 33.447 | 21.9914 | 17.5376 | 20.8834 | 10.538 | 7.376571 | 30.224 | 18.6788 |
| o-Cymene                                                                                      |        |         |         | 13.5942 | 6.7302 | 5.111848 | 606.76 | 427.025 |
| 3-Carene                                                                                      |        |         |         |         |        |          | 7.5209 | 5.42402 |
| (+)-4-Carene                                                                                  |        |         |         |         |        |          | 50.64  | 34.6676 |
| 5-Hepten-2-one, 6-methyl-                                                                     |        |         |         | 10.2336 | 10.682 | 10.88084 |        |         |
| 1,3,8-p-Menthatriene                                                                          |        |         |         | 2.29497 |        | 1.816453 |        |         |
| Nonanal                                                                                       |        |         |         |         |        |          | 2.1878 | 2.34205 |
| Phenol, m-tert-butyl-                                                                         |        |         |         | 2.86543 | 1.5902 |          |        |         |
| Benzene, (2-methyl-1-propenyl)-o-Isopropenyltoluene                                           |        |         |         | 11.3336 |        | 3.139442 |        |         |
| Benzene, 1-methyl-4-(1-methylethen yl)-                                                       |        |         |         | 9.12544 | 4.545  | 4.29712  | 11.281 | 8.10744 |
| Acetic acid                                                                                   | 1.808  | 1.5571  |         | 18.0568 | 8.2228 | 4.513972 | 4.0845 | 2.85738 |
| Ethyl 2-(5-methyl-5-vinyltetrahydrofuran-2-yl)propan-2-yl carbonate                           |        |         |         |         |        |          | 4.0659 | 3.50296 |
| .alfa.-Copaene                                                                                |        |         |         | 13.1847 | 7.6344 | 6.900076 | 94.028 | 94.5096 |
| 3-Nonen-5-yne, 4-ethyl-, (Z)-                                                                 |        |         |         |         |        |          |        |         |
| Formic acid                                                                                   |        |         |         | 3.35547 |        |          |        |         |

|                                                                                              |        |  |        |         |        |          |        |         |
|----------------------------------------------------------------------------------------------|--------|--|--------|---------|--------|----------|--------|---------|
| (+)-2-Bornanone                                                                              |        |  |        |         |        |          | 2.758  | 1.94493 |
| Benzaldehyde                                                                                 | 1.3892 |  | 1.2501 | 3.19762 | 1.5245 | 1.862566 | 29.016 | 20.3228 |
| 1,6-Octadien-3-ol, 3,7-dimethyl-                                                             |        |  |        | 11.5246 | 1.97   | 2.706934 | 156.7  | 132.921 |
| Dimethyl Sulfoxide                                                                           |        |  |        |         |        |          |        |         |
| Pinocarvone                                                                                  |        |  |        | 2.20061 |        |          |        |         |
| Bicyclo[7.2.0]undec-4-ene, 4,11,11-trimethyl-8-methylene-                                    |        |  |        |         |        |          | 2.7452 | 2.25969 |
| Pulegone                                                                                     |        |  |        | 15.5021 |        | 7.376213 |        |         |
| 1H-Pyrrole, 2-ethyl-4-methyl-                                                                |        |  |        |         | 8.4928 |          |        |         |
| Cyclohexane, 1-ethenyl-1-methyl-2, 4-bis(1-methylethenyl)-, [1S-(1.alpha.,2.beta.,4.beta.)]- |        |  |        | 8.25169 | 5.0409 | 4.689639 |        |         |
| Caryophyllene                                                                                |        |  |        | 28.7309 | 19.528 | 17.65576 | 188.55 | 195.162 |
| Terpinen-4-ol                                                                                |        |  |        |         |        |          | 9.4855 | 8.59715 |
| Alloaromadendrene                                                                            |        |  |        | 2.85523 | 1.7952 | 1.852218 | 4.6324 | 5.55091 |
| Acetophenone                                                                                 |        |  |        | 3.71816 | 2.091  | 1.356646 | 2.1881 | 1.74342 |
| Humulene                                                                                     |        |  |        | 4.78048 | 2.3705 | 2.184016 | 19.959 | 20.2854 |
| tr,Citral                                                                                    |        |  |        | 496.041 | 365.79 | 294.3516 | 1.5711 | 1.57797 |
| 2-Carene                                                                                     |        |  |        | 7.88446 | 5.4738 | 4.249186 | 10.441 | 9.44769 |
| endo-Borneol                                                                                 |        |  |        |         |        |          | 2.6924 | 2.59979 |
| cis,Citral                                                                                   |        |  |        | 530.057 | 372.53 | 302.7714 | 2.866  | 2.41159 |
| 2-Butenal, 3-methyl-                                                                         |        |  |        | 9.60867 | 6.3719 | 6.604993 |        |         |
| Furan, 2,3-dihydro-4-methyl-                                                                 |        |  |        |         | 7.4404 |          |        |         |
| 2-Oxo-6-(piperidine-1-sulfonyl)-benzoxazole-3-carboxylic acid 2-chloro-ethyl ester           |        |  |        |         | 5.7928 |          |        |         |
| Naphthalene, 1,2,3,5,6,8a-hexahydro-4,7-dimethyl-1-(1-methylethyl)-,(1S-cis)-                |        |  |        |         |        |          | 2.0176 | 1.94366 |
| Safrole                                                                                      |        |  |        |         |        |          | 15.964 | 11.5252 |
| Butylated Hydroxytoluene                                                                     |        |  |        |         |        |          |        |         |
| Hexane, 1-(1-methoxyethoxy)-                                                                 |        |  |        | 1.64373 |        |          |        |         |
| Epoxy-linalooloxide                                                                          |        |  |        |         |        |          |        |         |
| Phenol                                                                                       |        |  |        | 1.47307 |        | 1.237241 | 1.397  | 1.06314 |
| Cinnamaldehyde, (E)-                                                                         |        |  |        |         |        |          | 5.5097 | 3.8318  |
| 1,3-Cyclohexadiene-1-carboxaldehyde, 2,6,6-trimethyl-                                        |        |  |        | 2.80461 | 1.4412 | 1.37144  |        |         |
| Eugenol / 3-Allyl-6-methoxyphenol                                                            |        |  |        | 2.95068 | 2.2234 | 2.252182 | 135.14 | 118.08  |
| Benzoic acid                                                                                 |        |  |        |         |        |          | 1.5823 |         |
|                                                                                              |        |  |        |         |        |          |        |         |

|                                                      | 5-T-14<br>(×10 <sup>6</sup> ) | 7-T-0<br>(×10 <sup>6</sup> ) | 7-T-8<br>(×10 <sup>6</sup> ) | 7-T-14<br>(×10 <sup>6</sup> ) | 9-T-0<br>(×10 <sup>6</sup> ) | 9-T-8<br>(×10 <sup>6</sup> ) | 9-T-14<br>(×10 <sup>6</sup> ) |  |
|------------------------------------------------------|-------------------------------|------------------------------|------------------------------|-------------------------------|------------------------------|------------------------------|-------------------------------|--|
| 1-Propene, 2-methyl-                                 | 0.5994                        |                              |                              |                               |                              |                              |                               |  |
| n-Hexane                                             | 0.7328                        |                              |                              | 0.70061                       | 1.0707                       |                              |                               |  |
| 2-Butene, 2-methyl-                                  |                               | 0.9083                       |                              | 0.45004                       |                              |                              |                               |  |
| 1,3-Butadiene, 2-methyl-                             |                               | 15.0587                      | 8.10977                      | 7.55893                       |                              |                              |                               |  |
| Hexane, 3-methyl-                                    | 1.0974                        | 6.84972                      | 8.30277                      | 7.51163                       |                              |                              |                               |  |
| Pentane, 3-ethyl-                                    |                               | 1.1643                       | 1.36268                      | 1.10837                       |                              |                              |                               |  |
| Heptane                                              |                               | 2.08339                      | 1.37878                      |                               |                              |                              |                               |  |
| Cyclopentane, 1,3-dimethyl-                          |                               | 2.0843                       | 2.10949                      | 1.71695                       |                              |                              |                               |  |
| Cyclopentane, 1,2-dimethyl-                          |                               | 5.46859                      | 5.66471                      | 4.54719                       |                              |                              |                               |  |
| Cyclohexane, methyl-                                 |                               | 10.5381                      | 11.849                       | 10.2426                       |                              |                              |                               |  |
| Octane                                               |                               | 0.90044                      |                              |                               |                              |                              |                               |  |
| Propanal, 2-methyl-                                  |                               | 2.34676                      | 1.57397                      | 1.37138                       |                              |                              |                               |  |
| Acetone                                              | 1.3557                        | 36.6053                      | 33.0998                      | 30.7191                       |                              |                              |                               |  |
| 3-(2-Cyclopenten-1-yl)propanal                       |                               |                              |                              |                               |                              |                              |                               |  |
| Tetrahydrofuran                                      | 43.31                         | 196.479                      | 152.069                      | 107.248                       |                              |                              |                               |  |
| 3-Nonene, (E)-                                       |                               |                              |                              |                               |                              |                              |                               |  |
| 2-Butenal                                            |                               | 6.69452                      | 4.55904                      | 3.66366                       |                              |                              |                               |  |
| 1-Tridecyne                                          |                               |                              |                              |                               |                              |                              |                               |  |
| Furan, 3-methyl-                                     |                               | 4.32927                      | 1.03957                      |                               |                              |                              |                               |  |
| (3,3-Dimethyloxiranyl)methanol / Acetamide           |                               | 3.11794                      |                              |                               |                              |                              |                               |  |
| Benzene                                              |                               |                              |                              |                               | 3.1704                       |                              |                               |  |
| Heptane, 2,2,4,6,6-pentamethyl-                      | 4.2955                        | 4.77518                      | 4.02634                      | 3.59421                       |                              |                              |                               |  |
| Methyl vinyl ketone                                  |                               | 14.1414                      |                              |                               |                              |                              |                               |  |
| 1,3,5-Hexatriene, 3-methyl-, (Z)-                    |                               |                              | 8.04152                      | 7.22648                       |                              |                              |                               |  |
| Cyclohexene,3-propyl-                                |                               | 9.51574                      | 5.9601                       | 5.11465                       |                              |                              |                               |  |
| Ethanone, 1-(2-methyl-2-cyclopente n-1-yl)-          |                               | 3.56827                      | 2.56821                      |                               |                              |                              |                               |  |
| 1,5-Heptadiene, 2,6-dimethyl-                        |                               | 5.23009                      |                              |                               |                              |                              |                               |  |
| Tricyclo[2.2.1.0(2,6)]heptane, 1,7 ,7-trimethyl-     | 8.1514                        | 9.19344                      | 7.19135                      | 7.24911                       |                              |                              |                               |  |
| (1S)-2,6,6-Trimethylbicyclo[3.1.1]hept-2-ene         | 1037.8                        | 1134.21                      | 934.761                      | 745.473                       |                              |                              |                               |  |
| Bicyclo[3.1.0]hex-2-ene, 2-methyl-5-(1-methylethyl)- | 41.37                         | 47.2464                      | 32.5049                      | 23.4992                       |                              |                              |                               |  |
| Toluene                                              | 5.5206                        | 15.2062                      | 8.41422                      | 6.05595                       | 4.3242                       | 3.652667                     |                               |  |
| Bicyclo[2.2.1]heptane, 7,7-dimethyl-2-methylene-     | 13.435                        |                              |                              |                               |                              |                              |                               |  |
| 3-Buten-2-ol, 2-methyl-                              |                               | 280.489                      | 182.961                      | 122.091                       |                              |                              |                               |  |

|                                                                                               |        |         |         |         |        |          |        |  |
|-----------------------------------------------------------------------------------------------|--------|---------|---------|---------|--------|----------|--------|--|
| Camphene                                                                                      | 361.8  | 369.877 | 305.686 | 248.114 |        |          |        |  |
| .beta.-Pinene                                                                                 | 220.92 | 210.152 | 173.557 | 136.81  |        |          |        |  |
| (+)-3-Carene                                                                                  | 47.341 | 50.7221 | 35.6877 | 26.6148 |        |          |        |  |
| .alpha.-Phellandrene                                                                          | 366.68 | 366.872 | 241.327 | 172.022 |        |          |        |  |
| .beta.-Myrcene                                                                                | 33.307 | 45.9326 | 25.8526 | 16.5277 |        |          |        |  |
| 1,3-Cyclohexadiene, 1-methyl-4-(1-methylethyl)- / (+)-2-Carene                                | 55.11  | 51.9364 | 31.7716 | 22.5915 |        |          |        |  |
| Cyclopentanone                                                                                | 22.214 | 49.7009 | 34.4203 | 25.0863 |        |          |        |  |
| 2,3-Dehydro-1,8-cineole                                                                       |        | 4.09073 |         |         |        |          |        |  |
| D-Limonene                                                                                    | 111.47 | 145.899 | 93.2055 | 67.0071 |        |          |        |  |
| Eucalyptol                                                                                    | 75.46  | 63.7989 | 53.5102 | 43.7183 |        |          |        |  |
| .beta.-Phellandrene                                                                           | 168.83 | 163.938 | 110.919 | 81.7948 |        |          |        |  |
| 2,6-Dimethyl-1,3,5,7-octatetraene, E,E-                                                       |        | 19.6047 | 11.8214 | 9.77574 |        |          |        |  |
| .gamma.-Terpinene                                                                             | 12.537 | 13.2068 | 8.42322 | 6.21699 |        |          |        |  |
| 1,3,8-p-Menthatriene / Benzene, 1,4-diethyl- / Bicyclo[3.2.1]oct-2-ene, 3-methyl-4-methylene- |        | 25.1339 | 15.0327 | 12.6335 |        |          |        |  |
| .beta.-Ocimene                                                                                | 4.8719 | 6.79815 | 3.51441 | 2.42482 |        |          |        |  |
| Styrene                                                                                       | 12.239 | 25.7554 | 15.2297 | 10.8953 |        |          |        |  |
| o-Cymene                                                                                      | 293.53 | 354.88  | 227.841 | 169.333 |        |          |        |  |
| 3-Carene                                                                                      | 3.6404 | 3.68231 |         |         |        |          |        |  |
| (+)-4-Carene                                                                                  | 23.157 | 25.1675 | 15.4655 | 11.1176 |        |          |        |  |
| 5-Hepten-2-one, 6-methyl-                                                                     |        | 3.75639 | 3.0416  | 2.8956  |        |          |        |  |
| 1,3,8-p-Menthatriene                                                                          |        | 3.42083 | 2.74011 | 2.11024 |        |          |        |  |
| Nonanal                                                                                       | 2.3325 |         |         |         |        |          |        |  |
| Phenol, m-tert-butyl-                                                                         |        | 1.82435 |         |         |        |          |        |  |
| Benzene, 1-methyl-4-(1-methylethen yl)-                                                       | 5.1026 | 16.5722 | 9.50141 | 8.33267 |        |          |        |  |
| Acetic acid                                                                                   | 2.2005 | 6.62766 | 3.45122 | 2.53464 | 2.1833 | 1.588247 | 1.3903 |  |
| Ethyl 2-(5-methyl-5-vinyltetrahydrofuran-2-yl)propan-2-yl carbonate                           | 2.6557 | 3.05287 | 2.49029 | 1.7538  |        |          |        |  |
| .alfa.-Copaene                                                                                | 75.546 | 55.2674 | 49.3667 | 43.6397 |        |          |        |  |
| Formic acid                                                                                   |        | 2.46349 |         |         |        |          |        |  |
| (+)-2-Bornanone                                                                               | 1.8743 |         |         |         |        |          |        |  |
| Benzaldehyde                                                                                  | 15.462 | 17.3362 | 11.8064 | 9.53553 | 1.3532 | 1.334138 | 1.2028 |  |
| 1,6-Octadien-3-ol, 3,7-dimethyl-                                                              | 97.842 | 85.6894 | 68.1327 | 52.5424 |        |          |        |  |
| Pinocarvone                                                                                   |        | 1.1269  |         |         |        |          |        |  |

|                                                                                                              |        |         |         |         |        |          |      |  |  |
|--------------------------------------------------------------------------------------------------------------|--------|---------|---------|---------|--------|----------|------|--|--|
| Bicyclo[7.2.0]undec-4-ene,<br>4,11,11-trimethyl-8-<br>methylene-                                             |        |         |         | 7.29648 |        |          |      |  |  |
| Pulegone                                                                                                     |        | 11.0556 | 8.97407 |         |        |          |      |  |  |
| Cyclohexane, 1-ethenyl-1-<br>methyl-2, 4-bis(1-<br>methylethenyl)-, [1S-(1.alpha.<br>pha.,2.beta.,4.beta.)]- |        | 4.37808 | 3.92976 | 3.34354 |        |          |      |  |  |
| Caryophyllene                                                                                                | 159.45 | 114.004 | 110.071 | 100.468 |        |          |      |  |  |
| Terpinen-4-ol                                                                                                | 6.3006 | 5.26084 | 4.32369 | 3.53005 |        |          |      |  |  |
| Alloaromadendrene                                                                                            | 4.8371 | 4.50647 | 4.06686 | 3.4355  |        |          |      |  |  |
| Acetophenone                                                                                                 | 1.8827 | 1.45103 | 1.26986 | 1.21628 | 1.1856 |          |      |  |  |
| Humulene                                                                                                     | 15.762 | 9.51203 | 8.92919 | 9.67264 |        |          |      |  |  |
| tr. Citral                                                                                                   | 0.9708 | 332.905 | 267.301 | 207.181 |        |          |      |  |  |
| 2-Carene                                                                                                     | 6.6037 | 9.45166 | 7.81967 | 6.37981 |        |          |      |  |  |
| endo-Borneol                                                                                                 | 1.9193 | 2.53378 | 2.17321 | 2.46698 |        |          |      |  |  |
| cis, Citral                                                                                                  | 1.8513 | 368.949 | 288.097 | 223.196 |        |          |      |  |  |
| 2-Butenal, 3-methyl-                                                                                         |        | 5.20555 |         |         |        |          |      |  |  |
| Naphthalene, 1,2,3,5,6,8a-<br>hexahydro-4,7-dimethyl-1-(1-<br>methylethyl)-,(1S-cis)-                        | 1.8963 |         |         |         |        |          |      |  |  |
| Safrole                                                                                                      | 8.2081 | 8.23225 | 5.46296 | 4.32224 |        |          |      |  |  |
| Butylated Hydroxytoluene                                                                                     |        |         |         |         | 1.3492 | 1.463919 | 1.28 |  |  |
| Phenol                                                                                                       | 1.2602 | 1.96358 | 1.58642 | 1.36696 |        |          |      |  |  |
| Cinnamaldehyde, (E)-                                                                                         | 2.8429 | 2.98858 | 2.049   | 1.53936 |        |          |      |  |  |
| 1,3-Cyclohexadiene-1-<br>carboxaldehyde, 2,6,6-<br>trimethyl-                                                |        | 2.19312 | 1.52085 | 1.2719  |        |          |      |  |  |
| Eugenol / 3-Allyl-6-<br>methoxyphenol                                                                        | 90.858 | 68.5104 | 56.8758 | 45.503  |        |          |      |  |  |
| Benzoic acid                                                                                                 |        | 2.04274 |         |         |        |          |      |  |  |

**Table S4:** Detected major volatile compounds in the packaging with chicken samples and their relative concentrations (area of the chromatographic peak) at the 8<sup>th</sup> and 14<sup>th</sup> day of storage. Results are averaged from three parallel samples.

|                      | 1-T-8<br>(×10 <sup>6</sup> ) | 1-T-14<br>(×10 <sup>6</sup> ) | 2-T-8<br>(×10 <sup>6</sup> ) | 2-T-14<br>(×10 <sup>6</sup> ) | 3-T-8<br>(×10 <sup>6</sup> ) | 3-T-14<br>(×10 <sup>6</sup> ) | 4-T-8<br>(×10 <sup>6</sup> ) | 4-T-14<br>(×10 <sup>6</sup> ) | 5-T-8<br>(×10 <sup>6</sup> ) | 5-T-14<br>(×10 <sup>6</sup> ) |
|----------------------|------------------------------|-------------------------------|------------------------------|-------------------------------|------------------------------|-------------------------------|------------------------------|-------------------------------|------------------------------|-------------------------------|
| 1-Propene, 2-methyl- |                              |                               |                              |                               | 3.307                        | 3.0671                        | 3.128                        | 3.1855                        | 0.453                        |                               |
| Pentane              | 0.97916                      | 1.3506                        |                              | 0.71028                       | 1.151                        | 1.4352                        |                              | 0.5776                        |                              | 0.543                         |
| n-Hexane             |                              | 0.8485                        |                              | 0.80631                       |                              |                               | 1.54                         | 2.3882                        |                              | 0.643                         |



|                                                                |         |        |        |         |       |        |       |        |       |       |
|----------------------------------------------------------------|---------|--------|--------|---------|-------|--------|-------|--------|-------|-------|
| 2-Butene, 2-methyl-                                            |         |        |        |         | 2.159 | 2.2904 | 1.376 | 1.9758 |       |       |
| 1,3-Butadiene, 2-methyl-                                       |         |        |        |         | 1.932 | 1.6139 | 1.219 | 1.2509 |       |       |
| Pentane, 2,2,4-trimethyl-                                      |         |        |        |         |       |        |       | 2.1276 |       |       |
| Hexane, 3-methyl-                                              |         |        |        |         | 2.204 | 2.519  | 1.439 | 1.8531 | 0.976 | 1.075 |
| Heptane                                                        |         |        |        |         | 1.058 | 1.1444 | 0.811 |        |       |       |
| Carbon disulfide                                               | 2.31494 | 1.6086 | 2.6609 | 1.53498 | 1.664 | 1.0302 | 2.477 | 1.8849 | 1.826 | 1.421 |
| Dimethyl sulfide                                               | 4.8014  | 16.951 | 7.1598 |         | 4.49  | 3.9051 | 6.623 |        | 11.26 | 5.049 |
| Octane                                                         |         |        |        |         | 1.461 | 1.1079 | 1.23  |        |       |       |
| Acetone                                                        | 8.02099 | 7.1833 | 7.6172 | 6.95285 | 16.6  | 19.138 | 14.84 | 17.792 | 6.651 | 6.167 |
| 3-(2-Cyclopenten-1-yl)propanal                                 |         |        |        |         | 1.868 | 1.7861 |       |        |       |       |
| Tetrahydrofuran                                                | 9.204   | 6.5329 | 4.0977 | 4.62634 | 6.258 | 6.008  | 5.045 | 4.9107 | 5.126 | 4.117 |
| Cyclopentane, 2-ethyl-1,1-dimethyl                             |         |        |        |         | 5.899 | 6.1305 | 5.038 | 4.498  |       |       |
| 3-Nonene, (E)-                                                 |         |        |        |         |       |        | 5.6   |        |       |       |
| 1-Tridecyne                                                    |         |        |        |         | 5.477 | 5.0542 | 4.383 | 3.6994 |       |       |
| Furan, 3-methyl-                                               |         |        |        |         | 2.903 | 2.5623 | 2.964 | 2.5807 |       |       |
| Isopropyl Alcohol                                              |         |        |        |         |       | 4.5507 |       | 4.5903 |       |       |
| Ethanol                                                        |         |        |        |         |       | 1.6441 |       | 2.2963 |       |       |
| Benzene                                                        |         |        |        |         |       |        | 3.333 |        |       |       |
| Cyclohexene,3-propyl-                                          |         |        |        |         | 10.31 | 9.4209 | 10.01 | 7.0748 |       |       |
| Ethanone, 1-(2-methyl-2-cyclopente n-1-yl)-                    |         |        |        |         | 3.823 | 4.279  | 3.55  | 3.2539 |       |       |
| 1,5-Heptadiene, 2,6-dimethyl-                                  |         |        |        |         | 4.129 | 3.7736 | 4.315 | 4.1098 |       |       |
| Tricyclo[2.2.1.0(2,6)]heptane, 1,7,7-trimethyl-                |         |        |        |         |       |        |       |        | 4.068 |       |
| (1S)-2,6,6-Trimethylbicyclo[3.1.1]hept-2-ene                   |         |        |        |         |       |        |       |        | 564.4 | 500.5 |
| Bicyclo[3.1.0]hex-2-ene, 2-methyl-5-(1-methylethyl)-           |         |        |        |         |       |        |       |        | 25.3  | 19.08 |
| Toluene                                                        |         |        |        |         |       |        |       |        | 5.756 | 4.248 |
| Bicyclo[2.2.1]heptane, 7,7-dimethyl-2-methylene-               |         |        |        |         |       |        |       |        | 5.266 | 4.943 |
| 3-Buten-2-ol, 2-methyl-                                        |         |        |        |         |       | 4.3483 |       |        |       |       |
| Camphene                                                       |         |        |        |         |       |        |       |        | 145.7 | 134.2 |
| .beta.-Pinene                                                  |         |        |        |         |       |        |       |        | 91.9  | 79.37 |
| (+)-3-Carene                                                   |         |        |        |         |       |        |       |        | 25.72 | 20.11 |
| .alpha.-Phellandrene                                           |         |        |        |         |       |        |       |        | 256.9 | 190.1 |
| .beta.-Myrcene                                                 |         |        |        |         |       |        |       |        | 26.28 | 18.7  |
| 1,3-Cyclohexadiene, 1-methyl-4-(1-methylethyl)- / (+)-2-Carene |         |        |        |         |       |        |       |        | 35.16 | 26.3  |
| D-Limonene                                                     |         |        | 5.5083 |         | 6.838 | 5.8856 | 7.539 | 4.9148 | 81.27 | 61.47 |
| Eucalyptol                                                     |         |        |        |         |       |        |       |        | 4.969 | 4.224 |
| .beta.-Phellandrene                                            |         |        |        |         |       |        |       |        | 104.9 | 79.68 |
| Cyclobutene, bis(1-methylethylidene)-                          |         |        |        |         |       | 3.0145 |       |        |       |       |

|                                                                                                         |         |        |        |         |       |        |       |        |       |       |
|---------------------------------------------------------------------------------------------------------|---------|--------|--------|---------|-------|--------|-------|--------|-------|-------|
| .gamma.-Terpinene                                                                                       |         |        |        |         |       |        |       |        | 8.071 | 5.609 |
| 1,3,8-p-Menthatriene /<br>Benzene, 1,4-diethyl- /<br>Bicyclo[3.2.1]oct-2-ene, 3-<br>methyl-4-methylene- |         |        |        |         | 4.356 | 4.1848 | 3.574 | 3.4361 |       |       |
| .beta.-Ocimene                                                                                          |         |        |        |         |       |        |       |        | 4.026 | 2.606 |
| Styrene                                                                                                 | 8.47534 | 5.6956 | 6.3347 | 5.40617 | 5.192 | 4.4747 | 5.453 | 4.3488 | 10.3  | 8.033 |
| o-Cymene                                                                                                |         |        |        |         | 3.228 | 2.7271 | 2.995 | 2.5092 | 198.2 | 157.7 |
| 3-Carene                                                                                                |         |        |        |         |       |        |       |        | 2.844 |       |
| Cyclohexene, 1-methyl-4-<br>(1-methyle thylidene)-                                                      |         |        |        |         |       |        |       |        |       | 8.571 |
| (+)-4-Carene                                                                                            |         |        |        |         |       |        |       |        | 13.19 | 9.085 |
| 5-Hepten-2-one, 6-methyl-                                                                               |         |        |        |         | 2.489 | 3.6023 | 3.32  | 5.2373 |       |       |
| Nonanal                                                                                                 |         |        |        |         | 1.837 |        |       |        |       |       |
| Benzene, (2-methyl-1-<br>propenyl)-o-<br>Isopropenyltoluene                                             |         |        |        |         | 2.709 | 2.248  |       |        |       |       |
| Benzene, 1-methyl-4-(1-<br>methylethen yl)-                                                             |         |        |        |         |       |        | 2.083 | 2.4523 | 2.07  | 1.902 |
| Acetic acid                                                                                             |         | 1.2544 | 1.5114 | 2.02384 | 2.599 | 1.5752 | 1.598 | 1.9778 | 1.247 | 1.446 |
| .alfa.-Copaene                                                                                          |         |        |        |         | 2.213 | 2.1868 | 2.231 | 2.2399 | 30.22 | 26.57 |
| 3-Nonen-5-yne, 4-ethyl-,<br>(Z)-                                                                        |         |        |        |         | 2.744 | 4.5119 |       | 2.7965 |       |       |
| Benzaldehyde                                                                                            | 1.23113 | 1.5726 | 1.3221 | 1.64815 | 1.83  | 2.0619 | 1.713 | 2.0998 | 2.608 | 1.786 |
| 1,6-Octadien-3-ol, 3,7-<br>dimethyl-                                                                    |         |        |        |         |       |        |       |        | 26.81 | 22.99 |
| Dimethyl Sulfoxide                                                                                      | 1.93159 | 6.1066 | 2.7283 |         | 2.44  | 2.6109 | 4.141 |        | 2.402 | 1.382 |
| Pulegone                                                                                                |         |        |        |         |       |        |       |        |       |       |
| 1H-Pyrrole, 2-ethyl-4-<br>methyl-                                                                       |         |        |        |         | 2.347 | 5.4131 | 2.22  | 3.3271 |       |       |
| Cyclohexane, 1-ethenyl-1-<br>methyl-2, 4-bis(1-<br>methylethenyl)-, [1S-(1.alfa,<br>2.beta.,4.beta.)]-  |         |        |        |         | 1.754 | 2.0665 | 2.055 | 2.1275 |       |       |
| Caryophyllene                                                                                           |         |        |        |         | 5.947 | 6.9283 | 6.948 | 7.1725 | 71.5  | 67.62 |
| Terpinen-4-ol                                                                                           |         |        |        |         |       |        |       |        | 0.775 | 0.708 |
| Alloaromadendrene                                                                                       |         |        |        |         |       |        |       |        | 2.476 | 2.183 |
| Acetophenone                                                                                            |         |        |        | 1.20848 |       | 1.1192 | 1.036 | 1.2982 | 1.265 | 1.245 |
| Humulene                                                                                                |         |        |        |         |       |        |       |        | 6.976 | 6.857 |
| tr, Citral                                                                                              |         |        |        |         | 94.71 | 99.753 | 104.8 | 93.085 |       |       |
| 2-Carene                                                                                                |         |        |        |         |       | 2.3573 |       |        | 2.224 | 2.095 |
| cis, Citral                                                                                             |         |        |        |         | 139.5 | 145.35 | 150.4 | 141.01 |       |       |
| 2-Butenal, 3-methyl-                                                                                    |         |        |        |         |       |        |       |        |       |       |
| Furan, 2,3-dihydro-4-<br>methyl-                                                                        |         |        |        |         | 1.855 | 2.4486 | 2.519 | 2.2294 |       |       |
| 2-Oxo-6-(piperidine-1-<br>sulfonyl)-benzoxazole-3-<br>carboxylic acid 2-chloro-<br>ethyl ester          |         |        |        |         |       | 1.7284 | 1.737 | 1.7333 |       |       |

|                                                       |                            |                             |                            |                             |                            |                             |                            |                             |                             |                              |
|-------------------------------------------------------|----------------------------|-----------------------------|----------------------------|-----------------------------|----------------------------|-----------------------------|----------------------------|-----------------------------|-----------------------------|------------------------------|
| Safrole                                               |                            |                             |                            |                             |                            |                             |                            |                             | 6.4                         | 6.362                        |
| Hexane, 1-(1-methoxyethoxy)-                          |                            |                             |                            |                             | 1.849                      | 2.544                       |                            |                             |                             |                              |
| Epoxy-linalooloxide                                   |                            |                             |                            |                             |                            | 2.0489                      |                            | 1.571                       |                             |                              |
| Phenol                                                |                            |                             |                            |                             |                            | 1.0863                      |                            | 1.2198                      |                             |                              |
| Cinnamaldehyde, (E)-                                  |                            |                             |                            |                             |                            |                             |                            |                             | 1.71                        | 1.725                        |
| 1,3-Cyclohexadiene-1-carboxaldehyde, 2,6,6-trimethyl- |                            |                             |                            |                             |                            | 1.2203                      |                            |                             |                             |                              |
| Eugenol / 3-Allyl-6-methoxyphenol                     |                            |                             |                            |                             | 1.183                      | 1.5706                      |                            |                             | 51.84                       | 59.15                        |
| Benzoic acid                                          |                            |                             |                            |                             |                            |                             |                            | 1.6459                      |                             |                              |
|                                                       |                            |                             |                            |                             |                            |                             |                            |                             |                             |                              |
|                                                       | 6-T-8<br>( $\times 10^6$ ) | 6-T-14<br>( $\times 10^6$ ) | 7-T-8<br>( $\times 10^6$ ) | 7-T-14<br>( $\times 10^6$ ) | 8-T-8<br>( $\times 10^6$ ) | 8-T-14<br>( $\times 10^6$ ) | 9-T-8<br>( $\times 10^6$ ) | 9-T-14<br>( $\times 10^6$ ) | 10-T-8<br>( $\times 10^6$ ) | 10-T-14<br>( $\times 10^6$ ) |
| 1-Propene, 2-methyl-                                  | 0.44116                    | 0.4952                      | 0.9754                     | 0.85998                     |                            | 0.8552                      |                            |                             | 0.354                       | 0.393                        |
| Pentane                                               |                            |                             | 0.5594                     | 0.66081                     |                            |                             |                            | 0.5673                      |                             |                              |
| n-Hexane                                              |                            | 0.7915                      |                            |                             |                            | 1.6393                      |                            |                             |                             |                              |
| 2-Butene, 2-methyl-                                   |                            |                             | 1.4494                     | 1.35867                     | 0.888                      |                             |                            |                             |                             |                              |
| 1,3-Butadiene, 2-methyl-                              |                            |                             | 1.6255                     | 1.51267                     | 1.326                      | 1.3529                      |                            |                             |                             |                              |
| Pentane, 2,2,4-trimethyl-                             |                            |                             |                            |                             |                            |                             |                            |                             |                             |                              |
| Hexane, 3-methyl-                                     | 1.03387                    | 1.2668                      | 2.2453                     | 2.30716                     | 1.795                      | 2.2344                      |                            |                             |                             |                              |
| Heptane                                               |                            |                             |                            |                             |                            |                             |                            |                             |                             |                              |
| Carbon disulfide                                      | 1.37776                    | 0.9241                      | 1.532                      | 1.01913                     | 1.453                      | 1.0482                      | 3.807                      | 3.5192                      | 3.122                       | 3.328                        |
| Dimethyl sulfide                                      | 1.43428                    |                             | 6.0022                     | 5.78821                     |                            |                             | 8.674                      | 11.05                       |                             |                              |
| Octane                                                |                            |                             |                            |                             |                            |                             |                            |                             |                             |                              |
| Acetone                                               | 6.44546                    | 5.961                       | 8.0983                     | 8.82527                     | 7.473                      | 9.2264                      | 6.137                      | 5.8435                      | 7.019                       | 6.521                        |
| 3-(2-Cyclopenten-1-yl)propanal                        |                            |                             |                            |                             |                            |                             |                            |                             |                             |                              |
| Tetrahydrofuran                                       | 4.94868                    | 4.4141                      | 5.0356                     | 5.81674                     | 4.826                      | 5.4038                      |                            |                             |                             |                              |
| Isopropyl Alcohol                                     |                            |                             |                            |                             |                            |                             |                            |                             |                             | 2.207                        |
| Ethanol                                               |                            |                             |                            |                             |                            |                             |                            |                             |                             | 1.482                        |
| Cyclohexene,3-propyl-                                 |                            |                             | 2.8862                     | 2.53854                     | 2.818                      |                             |                            |                             |                             |                              |
| Tricyclo[2.2.1.0(2,6)]heptane, 1,7,7-trimethyl-       | 3.85789                    | 3.9482                      |                            |                             |                            |                             |                            |                             |                             |                              |
| (1S)-2,6,6-Trimethylbicyclo[3.1.1]hept-2-ene          | 580.029                    | 462.98                      | 335.36                     | 372.863                     | 326.9                      | 326.76                      |                            |                             |                             |                              |
| Bicyclo[3.1.0]hex-2-ene, 2-methyl-5-(1-methylethyl)-  | 25.1591                    | 18.317                      | 12.285                     | 12.1628                     | 12.25                      | 9.933                       |                            |                             |                             |                              |
| Toluene                                               | 5.13705                    | 4.5348                      | 4.1653                     | 4.03992                     | 4.055                      | 3.7362                      |                            |                             |                             |                              |
| Bicyclo[2.2.1]heptane, 7,7-dimethyl-2-methylene-      | 5.59797                    | 5.7175                      |                            |                             |                            |                             |                            |                             |                             |                              |
| Camphene                                              | 150.755                    | 123.84                      | 83.03                      | 95.3635                     | 81.66                      | 83.54                       |                            |                             |                             |                              |
| .beta.-Pinene                                         | 93.6364                    | 73.669                      | 47.37                      | 53.2973                     | 47.55                      | 47.408                      |                            |                             |                             |                              |

|                                                                                               |         |        |        |         |       |        |       |        |       |       |
|-----------------------------------------------------------------------------------------------|---------|--------|--------|---------|-------|--------|-------|--------|-------|-------|
| (+)-3-Carene                                                                                  | 25.579  | 17.98  | 12.125 | 12.3757 | 12.59 | 11.012 |       |        |       |       |
| .alpha.-Phellandrene                                                                          | 251.574 | 173.42 | 101.35 | 95.3462 | 107   | 85.276 |       |        |       |       |
| .beta.-Myrcene                                                                                | 26.3131 | 16.808 | 11.633 | 9.96825 | 12.46 | 9.053  |       |        |       |       |
| 1,3-Cyclohexadiene, 1-methyl-4-(1-methylethyl)- / (+)-2-Carene                                | 34.6182 | 23.82  | 12.742 | 11.8567 | 13.41 | 10.46  |       |        |       |       |
| D-Limonene                                                                                    | 79.3087 | 54.469 | 42.211 | 38.778  | 45.1  | 35.297 |       | 3.9819 |       |       |
| Eucalyptol                                                                                    | 4.75418 | 3.9457 |        |         |       |        |       |        |       |       |
| .beta.-Phellandrene                                                                           | 102.665 | 71.932 | 44.012 | 41.5536 | 45.78 | 37.388 |       |        |       |       |
| 2,6-Dimethyl-1,3,5,7-octatetraene, E,E-                                                       |         |        | 4.6744 | 3.81501 | 4.727 | 3.1053 |       |        |       |       |
| .gamma.-Terpinene                                                                             | 7.93208 | 5.1019 | 3.2186 | 3.19232 | 3.472 | 2.8408 |       |        |       |       |
| 1,3,8-p-Menthatriene / Benzene, 1,4-diethyl- / Bicyclo[3.2.1]oct-2-ene, 3-methyl-4-methylene- |         |        | 6.0275 | 5.05602 | 6.104 | 4.2518 |       |        |       |       |
| .beta.-Ocimene                                                                                | 3.99987 | 2.4964 |        |         |       |        |       |        |       |       |
| Styrene                                                                                       | 9.46618 | 7.1075 | 7.7903 | 7.0493  | 8.192 | 6.7049 |       |        |       |       |
| o-Cymene                                                                                      | 193.932 | 141.54 | 103.98 | 95.2907 | 105.3 | 88.334 |       |        |       |       |
| 3-Carene                                                                                      |         |        |        |         |       |        |       |        |       |       |
| Cyclohexene, 1-methyl-4-(1-methylethylidene)-                                                 | 12.9154 | 7.6658 | 5.3909 | 4.40811 | 5.408 | 3.9107 |       |        |       |       |
| 5-Hepten-2-one, 6-methyl-                                                                     |         |        |        |         | 1.514 | 1.6769 |       |        |       |       |
| Nonanal                                                                                       |         |        |        |         |       |        | 1.497 |        |       | 1.386 |
| Benzene, 1-methyl-4-(1-methylethenyl)-                                                        | 1.9194  | 1.4016 | 3.2862 | 2.73702 | 3.356 | 2.5059 |       |        |       |       |
| Acetic acid                                                                                   | 1.22211 | 1.7827 | 1.3886 | 1.87732 |       | 1.7887 | 1.291 | 1.3878 |       | 1.888 |
| .alfa.-Copaene                                                                                | 28.3629 | 21.404 | 13.061 | 14.0254 | 12.93 | 13.305 |       |        |       |       |
| Benzaldehyde                                                                                  | 2.13304 | 1.6871 | 2.5323 | 2.50366 | 1.848 | 2.4324 | 1.287 | 1.4588 | 1.372 | 1.494 |
| 1,6-Octadien-3-ol, 3,7-dimethyl-                                                              | 25.7154 | 20.667 | 13.547 | 11.0673 | 11.75 | 8.6144 |       |        |       |       |
| Dimethyl Sulfoxide                                                                            | 1.63754 |        | 3.2339 | 2.72522 |       |        | 2.068 | 2.4157 |       |       |
| Pulegone                                                                                      |         |        | 1.8563 |         | 2.132 |        |       |        |       |       |
| Cyclohexane, 1-ethenyl-1-methyl-2, 4-bis(1-methylethenyl)-, [1S-(1.alpha.,2.beta.,4.beta.)]-  |         |        | 1.4097 | 1.31355 | 1.226 | 1.5527 |       |        |       |       |
| Caryophyllene                                                                                 | 71.1304 | 57.709 | 33.067 | 37.0886 | 33.18 | 36.524 |       |        |       |       |
| Terpinen-4-ol                                                                                 | 0.90424 | 0.6654 |        |         |       |        |       |        |       |       |
| Alloaromadendrene                                                                             | 2.16524 | 2.117  |        |         |       | 1.6157 |       |        |       |       |
| Acetophenone                                                                                  | 1.30031 |        | 1.1195 | 1.18377 |       | 1.2781 |       |        |       | 1.183 |
| Humulene                                                                                      | 7.59758 | 6.2935 | 2.8021 | 3.05545 | 3.061 | 2.9376 |       |        |       |       |
| tr, Citral                                                                                    |         |        | 83.723 | 59.0131 | 65.29 | 41.352 |       |        |       |       |
| 2-Carene                                                                                      | 2.14772 | 1.9502 | 2.42   | 2.02493 | 2.109 | 1.7457 |       |        |       |       |

|                                          |         |        |        |         |       |        |       |       |  |  |
|------------------------------------------|---------|--------|--------|---------|-------|--------|-------|-------|--|--|
| <b>cis,Citral</b>                        |         |        | 121.57 | 88.1894 | 100.3 | 67.624 | 1.221 | 2.058 |  |  |
| <b>2-Butenal, 3-methyl-</b>              |         |        |        |         | 0.918 |        |       |       |  |  |
| <b>Furan, 2,3-dihydro-4-methyl-</b>      |         |        | 1.4388 | 0.88086 | 1.427 | 0.8224 |       |       |  |  |
| <b>Safrole</b>                           | 7.85689 | 6.7379 | 3.3439 | 2.60822 | 3.347 | 2.5941 |       |       |  |  |
| <b>Phenol</b>                            |         |        | 1.1047 |         |       | 1.215  |       |       |  |  |
| <b>Cinnamaldehyde, (E)-</b>              | 1.97868 | 1.6421 | 1.235  |         |       |        |       |       |  |  |
| <b>Eugenol / 3-Allyl-6-methoxyphenol</b> | 66.998  | 68.504 | 26.456 | 21.1191 | 31.58 | 21.524 |       |       |  |  |
| <b>Benzoic acid</b>                      |         |        |        |         |       | 0.6873 |       |       |  |  |
